# Supplementary figures and images for: Trajectories of social outcomes in individuals born very preterm from childhood to adolescence
Source: PubMed Central journal article supplement — Acta Paediatr. 2024 Sep 26;114(2):355–63. doi: 10.1111/apa.17434 (PMC11706753; doi:10.1111/apa.17434), 2024-09-26

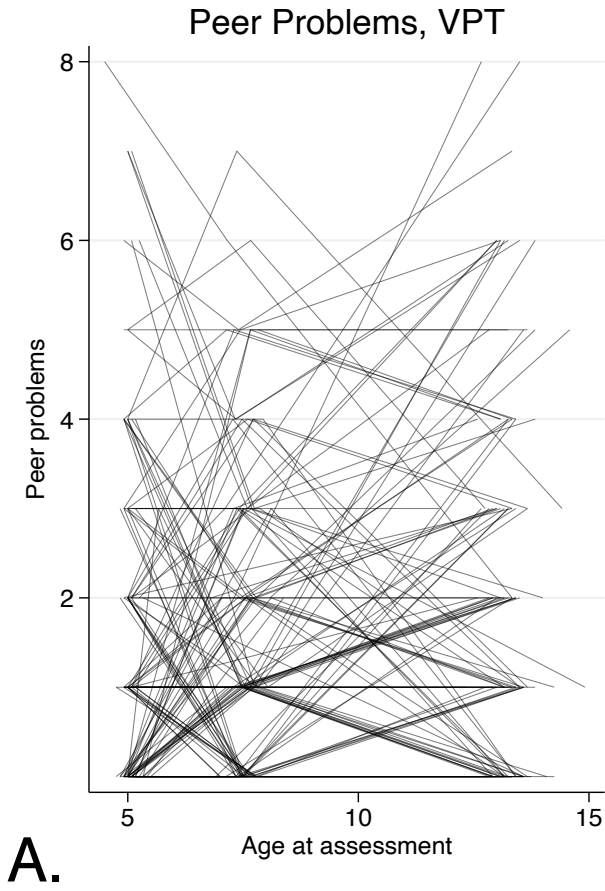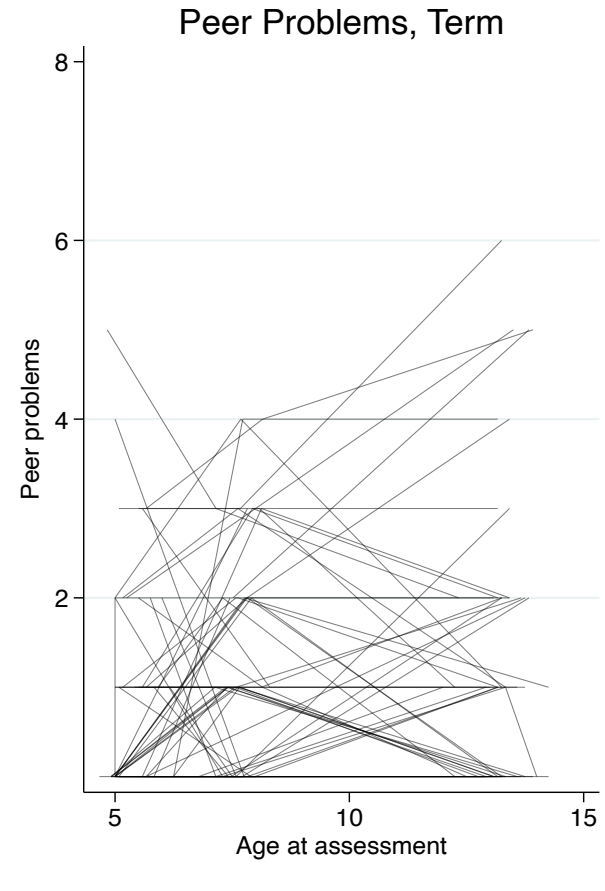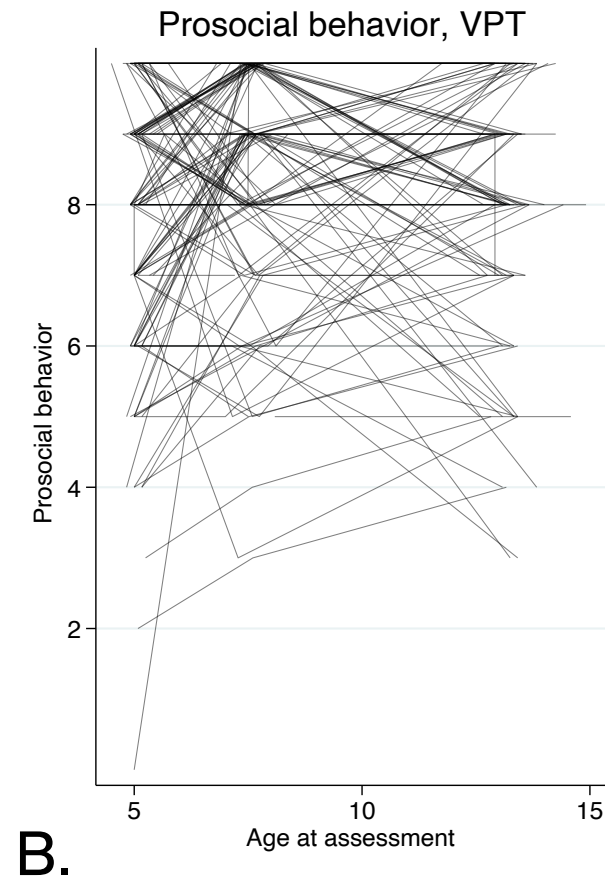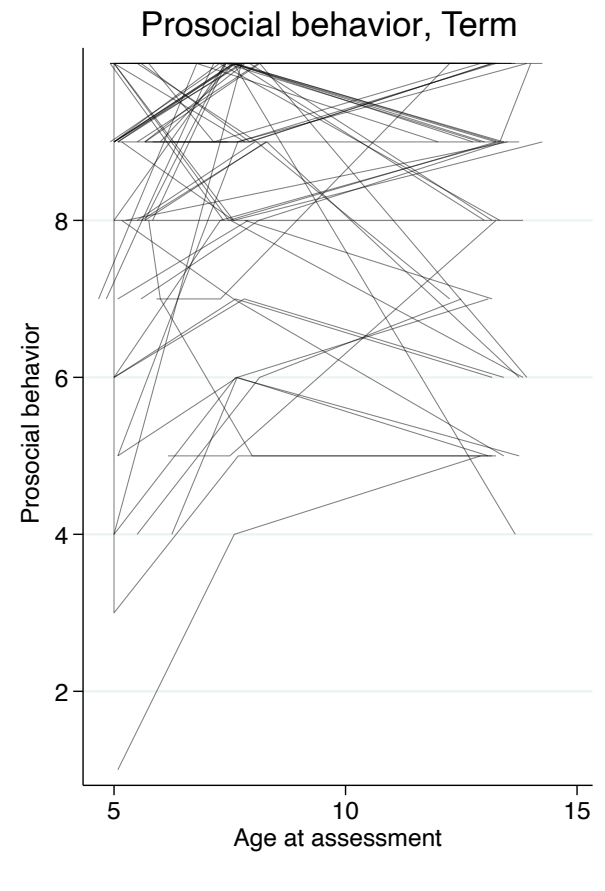

Supplement: APA-114-355-s002.pdf [file APA-114-355-s002.pdf]
